# Supplementary material
Source: PubMed Central journal article supplement (PMC4989318)
Supplement: ismej201627x1.pdf [file ismej201627x1.pdf]

## SUPPLEMENTARY FIGURES AND TABLES

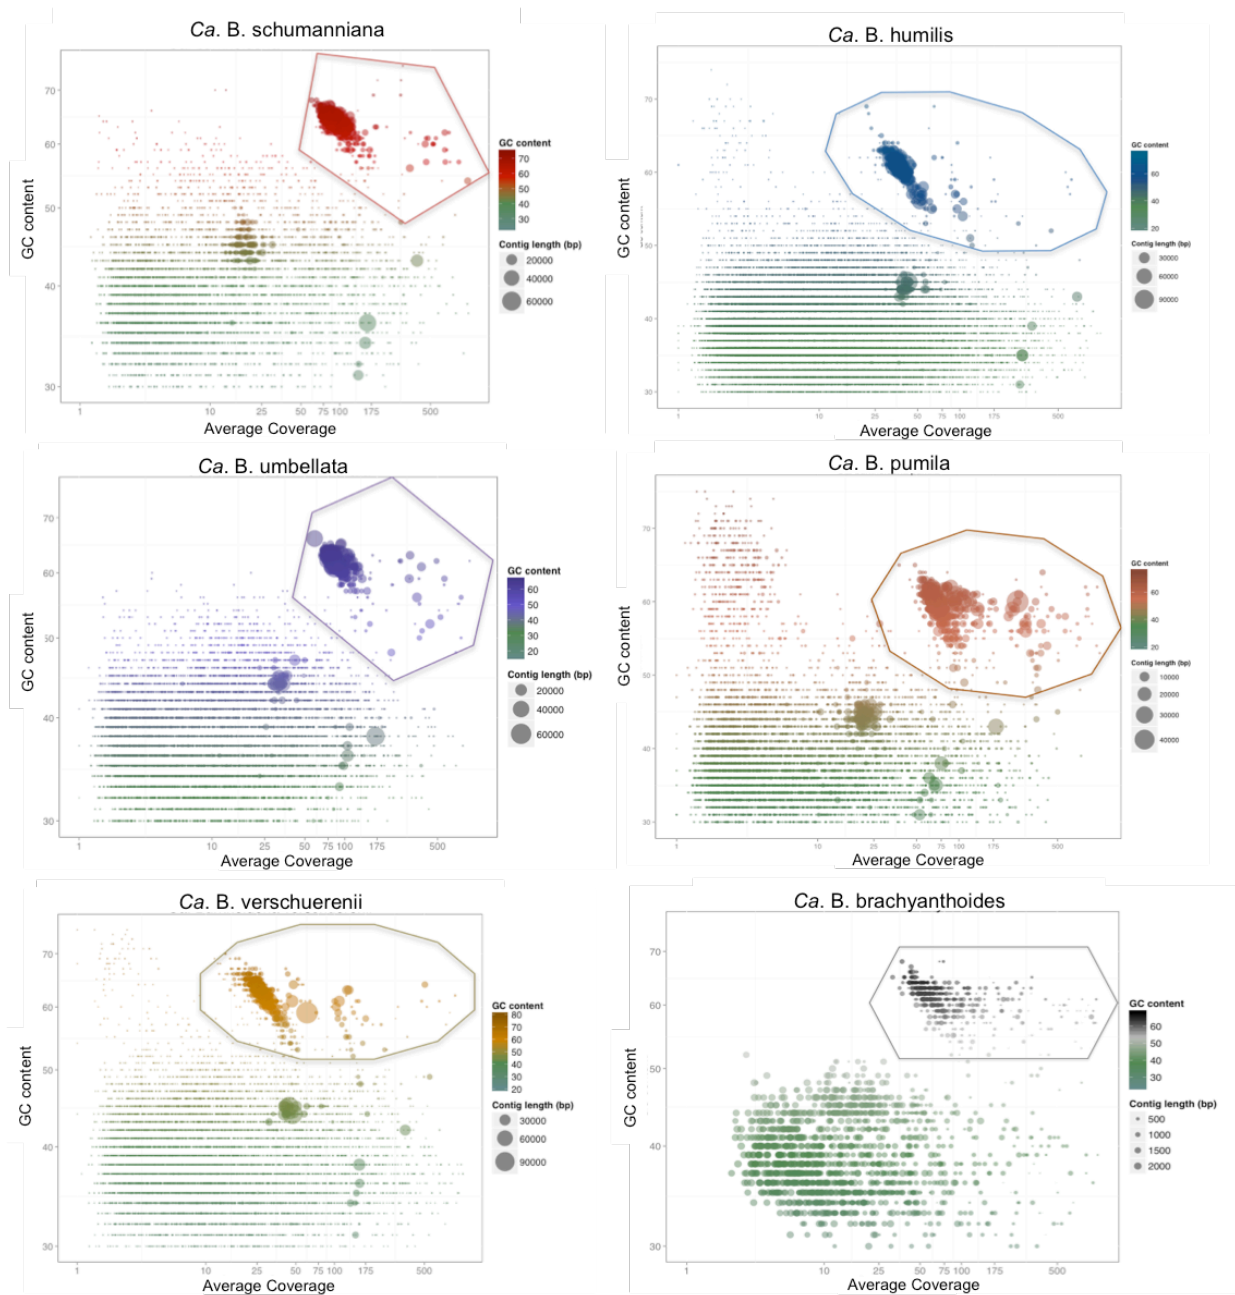

**Fig. S1. Shotgun assembly of leaf nodule DNA.** Contigs were plotted according to average coverage and GC content. Circles represent contigs, scaled by the square root of their length and colored by GC content. Contigs with high %GC and high coverage are bacterial in origin, while the rest comes from plant DNA. Contigs selected for bacteria genome assembly are circled. Large contigs with moderate coverage and low %GC comprise the chloroplast genome.

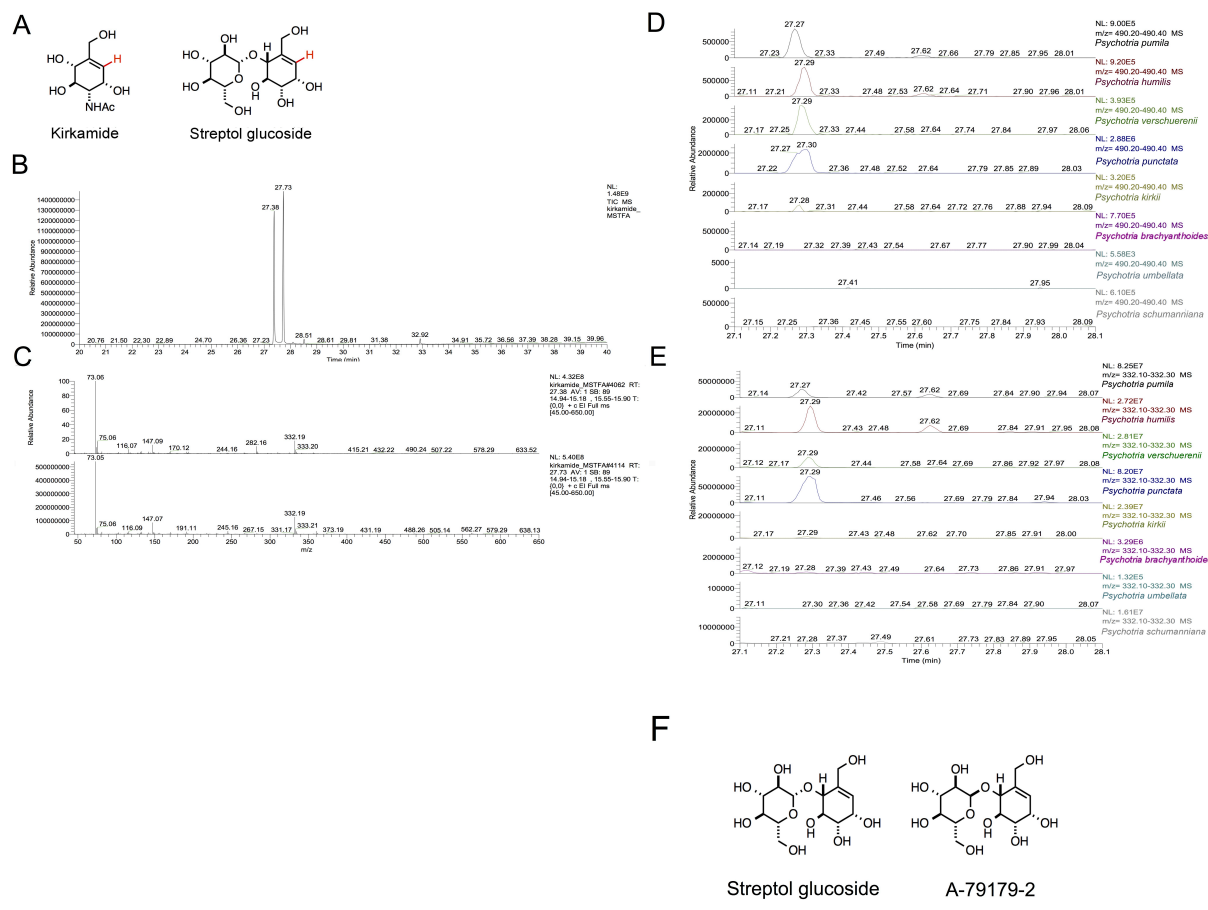

**Fig. S2. Detection of kirkamide in extracts of *Psychotria* and *Pavetta* leaves by GC-MS.** A. Natural products (kirkamide and streptol glucoside) quantified by NMR, the protons highlighted in red were used for the measurement. B. Total Ion Current (TIC) chromatogram of synthetic TMS-kirkamide. B. Mass spectra of synthetic TMS-kirkamide at the retention times of 27.38 min (kirkamide with 4 TMS) and 27.73 min (kirkamide with 5 TMS). C. GC-MS chromatograms of leaf extracts after MSTFA derivatization. Two diagnostic compounds with  $m/z = 490$  Da and  $577$  Da were used to detect kirkamide in complex extracts. X-axis: Retention time of the analytes (min), y-axis= Relative abundance. F. Structural comparison between streptol glucoside and A-79179-2.

**Table S1. Representation of the insertion sequence families diversity and predominance in the genomes of leaf nodule symbionts.** The families highlighted in grey are represented by at least one full transposase copy. Pseudogenes are indicated by  $\Psi$ .

|        | Ca. B.<br>kirkii | Ca. B.<br>punctata | Ca. B.<br>pumila | Ca. B.<br>schumanniana | Ca. B.<br>umbellata | Ca. B.<br>brachyanthoides | Ca. B.<br>humilis | Ca. B.<br>verschuerenii |
|--------|------------------|--------------------|------------------|------------------------|---------------------|---------------------------|-------------------|-------------------------|
| IS3    | 1/ 5 $\Psi$      | 36 $\Psi$          |                  | 10 $\Psi$              | 1 $\Psi$            | 1/ 0 $\Psi$               | 1/ 1 $\Psi$       |                         |
| IS4    | 4/ 18 $\Psi$     | 18 $\Psi$          |                  | 1/ 9 $\Psi$            |                     |                           | 1 $\Psi$          | 1/ 1 $\Psi$             |
| IS5    | 1/ 0 $\Psi$      | 1/ 0 $\Psi$        | 1/ 0 $\Psi$      | 1/ 0 $\Psi$            | 1/ 0 $\Psi$         | 1/ 0 $\Psi$               | 1/ 0 $\Psi$       | 1/ 2 $\Psi$             |
| IS200  | 1/ 4 $\Psi$      | 1/ 0 $\Psi$        | 1/ 0 $\Psi$      | 2 $\Psi$               | 1/ 0 $\Psi$         | 1/ 0 $\Psi$               | 1/ 0 $\Psi$       | 1/ 0 $\Psi$             |
| IS256  |                  |                    |                  |                        | 153 $\Psi$          |                           |                   | 2 $\Psi$                |
| IS30   |                  |                    | 17 $\Psi$        |                        |                     | 1/ 0 $\Psi$               |                   |                         |
| IS66   | 9/ 38 $\Psi$     | 1/ 0 $\Psi$        | 9 $\Psi$         | 1/ 56 $\Psi$           | 1/ 2 $\Psi$         | 1/ 2 $\Psi$               | 1 $\Psi$          | 3 $\Psi$                |
| IS110  |                  |                    | 4 $\Psi$         | 1/ 117 $\Psi$          | 1/ 167 $\Psi$       |                           | 1/ 25 $\Psi$      |                         |
| IS1182 |                  |                    |                  |                        | 88 $\Psi$           |                           |                   | 1 $\Psi$                |

A)

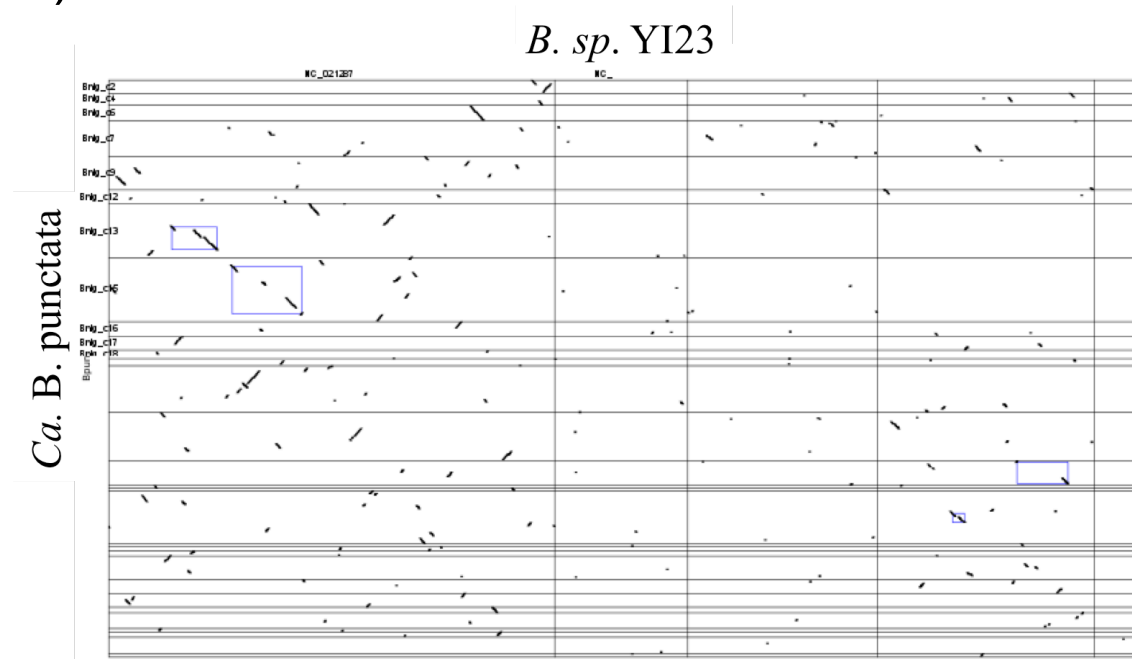

B)

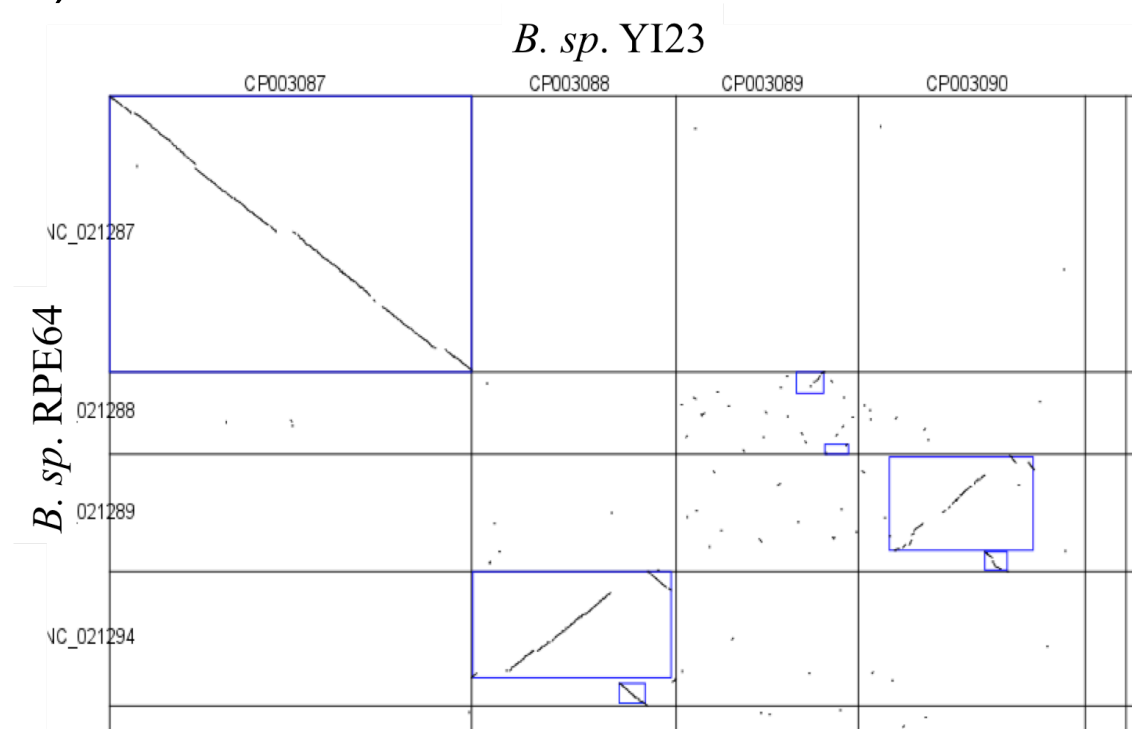

**Fig. S3. Dot plot representation of Mummer alignment between A. *Ca. B. punctata* and *B. sp. YI23*. B. *B. sp. RPE64* and *B. sp. YI23* as a visual reference. The degrees of relatedness between *Ca. B. punctata* and *B. sp. YI23* and *B. sp. RPE64* and *B. sp. YI23* are similar (see text). Note the lack of large syntenic stretches between *Ca. B. punctata* and *B. sp. YI23*.**

**Table S2. Comparative GC-content between functional genes and pseudogenes in leaf nodule symbionts.**

|                   | Ca. B.<br>kirkii | Ca. B.<br>punctata | Ca. B.<br>brachyanthoides | Ca. B.<br>humilis | Ca. B.<br>pumila | Ca. B.<br>schumanniana | Ca. B.<br>umbellata | Ca. B.<br>verschuerenii |
|-------------------|------------------|--------------------|---------------------------|-------------------|------------------|------------------------|---------------------|-------------------------|
| %GC functional    | 59.34            | 63.10              | 64.38                     | 62.12             | 60.78            | 60.15                  | 63.83               | 61.93                   |
| %GC pseudogenes   | 59.10            | 62.77              | 63.29                     | 62.19             | 60.55            | 59.86                  | 63.23               | 61.97                   |
| stdev functional  | 3.43             | 3.66               | 3.50                      | 3.74              | 3.64             | 3.61                   | 3.58                | 3.75                    |
| stdev pseudogenes | 5.55             | 5.65               | 7.01                      | 5.76              | 6.72             | 5.40                   | 6.47                | 5.83                    |

**Table S3. Essential candidate genes in *B. phymatum* missing in leaf nodule symbionts.**

| <b>Gene identifiers in <i>B. phymatum</i></b> | <b>Predicted Product</b>                                                             |
|-----------------------------------------------|--------------------------------------------------------------------------------------|
| gij186471077 ref YP_001862395.1               | 2-oxoglutarate dehydrogenase E1 component [Burkholderia phymatum STM815]             |
| gij186471992 ref YP_001859334.1               | phosphate ABC transporter substrate-binding protein [Burkholderia phymatum STM815]   |
| gij186473727 ref YP_001861069.1               | hexapaptide repeat-containing transferase [Burkholderia phymatum STM815]             |
| gij186474513 ref YP_001863484.1               | 2-oxo-acid dehydrogenase E1 subunit, homodimeric type [Burkholderia phymatum STM815] |
| gij186475621 ref YP_001857091.1               | hypothetical protein Bphy_0856 [Burkholderia phymatum STM815]                        |
| gij186476921 ref YP_001858391.1               | hypothetical protein Bphy_2170 [Burkholderia phymatum STM815]                        |
| gij186477415 ref YP_001858885.1               | redoxin domain-containing protein [Burkholderia phymatum STM815]                     |

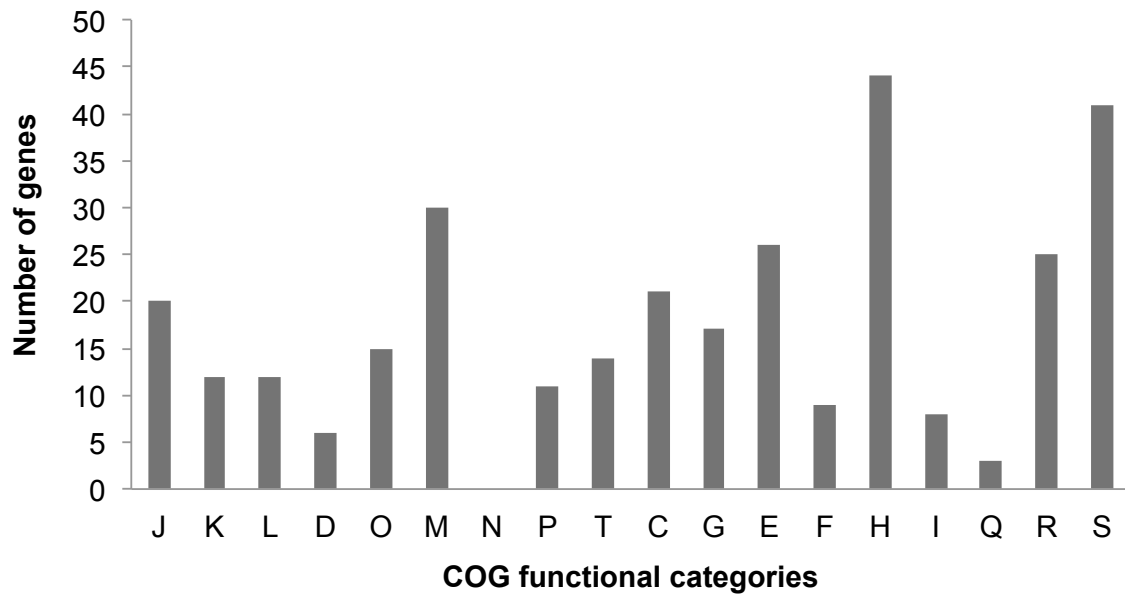

**Fig. S4. Categories of non-essential genes conserved in leaf nodule symbionts.** Cell envelope biogenesis and outer membrane (M) and coenzyme metabolism (H) are over-represented among the other gene categories.

**Table S4. List of non-essential core genes conserved in leaf nodule symbionts.** The genes involved in cell envelope biogenesis and outer membrane (M) and coenzyme metabolism (H) are shown in bold.

| Gene locus tag | Product                                                                                    | Functional COG categories                                              | Reactive Oxygen Species (ROS) detoxification |                     |
|----------------|--------------------------------------------------------------------------------------------|------------------------------------------------------------------------|----------------------------------------------|---------------------|
| Bkir_c10_6262  | 2-keto-3-deoxy-D-arabino-heptulosonate-7-phosphate synthase I alpha                        | Amino acid transport and metabolism                                    | E                                            |                     |
| Bkir_c12_2336  | Diaminopimelate epimerase                                                                  | Amino acid transport and metabolism                                    | E                                            |                     |
| Bkir_c14_3241  | D-amino acid dehydrogenase small subunit                                                   | Amino acid transport and metabolism                                    | E                                            |                     |
| Bkir_c149_4879 | 3-dehydroquinate synthase                                                                  | Amino acid transport and metabolism                                    | E                                            |                     |
| Bkir_c18_6035  | Aspartate-semialdehyde dehydrogenase                                                       | Amino acid transport and metabolism                                    | E                                            |                     |
| Bkir_c18_6039  | Phosphoribosylanthranilate isomerase                                                       | Amino acid transport and metabolism                                    | E                                            |                     |
| Bkir_c18_6040  | Tryptophan synthase beta chain                                                             | Amino acid transport and metabolism                                    | E                                            |                     |
| Bkir_c18_6041  | Tryptophan synthase alpha chain                                                            | Amino acid transport and metabolism                                    | E                                            |                     |
| Bkir_c2_4615   | 5-methyltetrahydrofolate--homocysteine methyltransferase                                   | Amino acid transport and metabolism                                    | E                                            |                     |
| Bkir_c2_4616   | 5-methyltetrahydrofolate--homocysteine methyltransferase                                   | Amino acid transport and metabolism                                    | E                                            |                     |
| Bkir_c31_1433  | Glycine oxidase ThiO                                                                       | Amino acid transport and metabolism                                    | E                                            |                     |
| Bkir_c31_1438  | Glutamate synthase [NADPH] large chain                                                     | Amino acid transport and metabolism                                    | E                                            |                     |
| Bkir_c38_2423  | putative cationic amino acid transporter                                                   | Amino acid transport and metabolism                                    | E                                            |                     |
| Bkir_c4_0303   | 2-isopropylmalate synthase                                                                 | Amino acid transport and metabolism                                    | E                                            |                     |
| Bkir_c43_2113  | Nitrogen regulatory protein P-II                                                           | Amino acid transport and metabolism                                    | E                                            |                     |
| Bkir_c51_2630  | Shikimate kinase I                                                                         | Amino acid transport and metabolism                                    | E                                            |                     |
| Bkir_c62_5030  | L-threonine 3-O-phosphate decarboxylase                                                    | Amino acid transport and metabolism                                    | E                                            |                     |
| Bkir_c7_1468   | N-acetyl-gamma-glutamyl-phosphate reductase                                                | Amino acid transport and metabolism                                    | E                                            |                     |
| Bkir_c7_1477   | Cysteine synthase B                                                                        | Amino acid transport and metabolism                                    | E                                            |                     |
| Bkir_c7_1489   | Cyclohexadienyl dehydrogenase                                                              | Amino acid transport and metabolism                                    | E                                            |                     |
| Bkir_c72_1660  | Glycine cleavage system H protein                                                          | Amino acid transport and metabolism                                    | E                                            |                     |
| Bkir_c72_1662  | Glycine dehydrogenase [decarboxylating](glycine cleavage system P protein)                 | Amino acid transport and metabolism                                    | E                                            |                     |
| Bkir_c77_5215  | N-acetylglutamate synthase                                                                 | Amino acid transport and metabolism                                    | E                                            |                     |
| Bkir_c132_1779 | Phosphoadenylyl-sulfate reductase [thioredoxin] / Adenylyl-sulfate reductase [thioredoxin] | Amino acid transport and metabolism / Coenzyme metabolism              | EH                                           | Thioredoxin pathway |
| Bkir_c132_1780 | Sulfate adenylyltransferase subunit 2                                                      | Amino acid transport and metabolism / Coenzyme metabolism              | EH                                           |                     |
| Bkir_c31_1437  | Glutamate synthase [NADPH] small chain                                                     | Amino acid transport and metabolism / General function prediction only | ER                                           |                     |
| Bkir_c1_2865   | Alpha,alpha-trehalose-phosphate synthase[UDP-forming]                                      | Carbohydrate transport and metabolism                                  | G                                            |                     |
| Bkir_c108_3931 | Mannose-6-phosphate isomerase                                                              | Carbohydrate transport and metabolism                                  | G                                            |                     |



|                       |                                                                                                                                              |                                                                        |          |  |
|-----------------------|----------------------------------------------------------------------------------------------------------------------------------------------|------------------------------------------------------------------------|----------|--|
| Bkir_c128_1243        | Fructose-bisphosphate aldolase class I                                                                                                       | Carbohydrate transport and metabolism                                  | G        |  |
| Bkir_c13_6194         | Trehalose-6-phosphate phosphatase                                                                                                            | Carbohydrate transport and metabolism                                  | G        |  |
| Bkir_c15_5370         | Phosphomannomutase /Phosphoglucomutase                                                                                                       | Carbohydrate transport and metabolism                                  | G        |  |
| Bkir_c20_3823         | Phosphoenolpyruvate synthase                                                                                                                 | Carbohydrate transport and metabolism                                  | G        |  |
| Bkir_c22_0076         | Pyruvate kinase                                                                                                                              | Carbohydrate transport and metabolism                                  | G        |  |
| Bkir_c44_1547         | Polymyxin resistance protein PmrJ, predicted deacetylase                                                                                     | Carbohydrate transport and metabolism                                  | G        |  |
| Bkir_c58_0780         | Glucose-6-phosphate isomerase                                                                                                                | Carbohydrate transport and metabolism                                  | G        |  |
| Bkir_c81_1223         | Glucose-6-phosphate 1-dehydrogenase                                                                                                          | Carbohydrate transport and metabolism                                  | G        |  |
| Bkir_c83_0844         | Putative transport protein                                                                                                                   | Carbohydrate transport and metabolism                                  | G        |  |
| Bkir_c79_3384         | PTS system nitrogen-specific IIA component,PtsN                                                                                              | Carbohydrate transport and metabolism / Signal transduction mechanisms | GT       |  |
| Bkir_c11_4427         | Chromosome partition protein smc                                                                                                             | Cell division and chromosome partitioning                              | D        |  |
| Bkir_c2_4610          | Cell division protein FtsN                                                                                                                   | Cell division and chromosome partitioning                              | D        |  |
| Bkir_c34_2546         | Cell division protein FtsL                                                                                                                   | Cell division and chromosome partitioning                              | D        |  |
| Bkir_c47_5649         | Cell division topological specificity factor MinE                                                                                            | Cell division and chromosome partitioning                              | D        |  |
| Bkir_c47_5650         | Septum site-determining protein MinD                                                                                                         | Cell division and chromosome partitioning                              | D        |  |
| Bkir_c47_5651         | Septum site-determining protein MinC                                                                                                         | Cell division and chromosome partitioning                              | D        |  |
| <b>Bkir_c1_2894</b>   | <b>Outer membrane protein (porin)</b>                                                                                                        | <b>Cell envelope biogenesis, outer membrane</b>                        | <b>M</b> |  |
| <b>Bkir_c106_6216</b> | <b>Membrane fusion protein of RND family multidrug efflux pump</b>                                                                           | <b>Cell envelope biogenesis, outer membrane</b>                        | <b>M</b> |  |
| <b>Bkir_c118_3289</b> | <b>Prolipoprotein diacylglycerol transferase</b>                                                                                             | <b>Cell envelope biogenesis, outer membrane</b>                        | <b>M</b> |  |
| <b>Bkir_c123_5759</b> | <b>Outer membrane lipoprotein LolB precursor</b>                                                                                             | <b>Cell envelope biogenesis, outer membrane</b>                        | <b>M</b> |  |
| <b>Bkir_c15_5294</b>  | <b>dTDP-4-dehydrorhamnose 3,5-epimerase</b>                                                                                                  | <b>Cell envelope biogenesis, outer membrane</b>                        | <b>M</b> |  |
| <b>Bkir_c15_5295</b>  | <b>Glucose-1-phosphate thymidyltransferase</b>                                                                                               | <b>Cell envelope biogenesis, outer membrane</b>                        | <b>M</b> |  |
| <b>Bkir_c15_5368</b>  | <b>Lipopolysaccharide heptosyltransferase I</b>                                                                                              | <b>Cell envelope biogenesis, outer membrane</b>                        | <b>M</b> |  |
| <b>Bkir_c15_5374</b>  | <b>Lipid carrier :UDP-N-acetylgalactosaminyltransferase /Alpha-1,3-N-acetylgalactosamine transferase PglA , Putative glycosyltransferase</b> | <b>Cell envelope biogenesis, outer membrane</b>                        | <b>M</b> |  |
| <b>Bkir_c15_5375</b>  | <b>UDP-glucose 4-epimerase</b>                                                                                                               | <b>Cell envelope biogenesis, outer membrane</b>                        | <b>M</b> |  |
| <b>Bkir_c15_5376</b>  | <b>Undecaprenyl-phosphate N-acetylglucosaminyl1-phosphate transferase</b>                                                                    | <b>Cell envelope biogenesis, outer membrane</b>                        | <b>M</b> |  |
| <b>Bkir_c167_0275</b> | <b>Probable transmembrane protein</b>                                                                                                        | <b>Cell envelope biogenesis, outer membrane</b>                        | <b>M</b> |  |
| <b>Bkir_c17_4544</b>  | <b>Rod shape-determining protein MreD</b>                                                                                                    | <b>Cell envelope biogenesis, outer membrane</b>                        | <b>M</b> |  |
| <b>Bkir_c2_4634</b>   | <b>Cytidyltransferase-related domain protein</b>                                                                                             | <b>Cell envelope biogenesis, outer membrane</b>                        | <b>M</b> |  |
| <b>Bkir_c22_0100</b>  | <b>Lipid A core-O-antigen ligase and related enzymes</b>                                                                                     | <b>Cell envelope biogenesis, outer membrane</b>                        | <b>M</b> |  |
| <b>Bkir_c22_0122</b>  | <b>N-acetylmuramoyl-L-alanine amidase</b>                                                                                                    | <b>Cell envelope biogenesis, outer membrane</b>                        | <b>M</b> |  |
| <b>Bkir_c32_4006</b>  | <b>Glycosyltransferase</b>                                                                                                                   | <b>Cell envelope biogenesis, outer membrane</b>                        | <b>M</b> |  |
| <b>Bkir_c32_4007</b>  | <b>Lipopolysaccharide core biosynthesis glycosyltransferase, group 2 family protein</b>                                                      | <b>Cell envelope biogenesis, outer membrane</b>                        | <b>M</b> |  |

|                |                                                                                                                     |                                                                                  |    |  |
|----------------|---------------------------------------------------------------------------------------------------------------------|----------------------------------------------------------------------------------|----|--|
| Bkir_c34_2536  | Cell division protein FtsQ                                                                                          | Cell envelope biogenesis, outer membrane                                         | M  |  |
| Bkir_c34_2542  | Phospho-N-acetylmuramoyl-pentapeptide- transferase                                                                  | Cell envelope biogenesis, outer membrane                                         | M  |  |
| Bkir_c34_2543  | UDP-N-acetylmuramoylalanyl-D-glutamyl-2, 6-diamino pimelate--D-alanyl-D-alanine ligase                              | Cell envelope biogenesis, outer membrane                                         | M  |  |
| Bkir_c4_0300   | Cell wall-associated hydrolases (invasion-associated proteins)                                                      | Cell envelope biogenesis, outer membrane                                         | M  |  |
| Bkir_c44_1550  | Polymyxin resistance protein ArnC, glycosyltransferase                                                              | Cell envelope biogenesis, outer membrane                                         | M  |  |
| Bkir_c44_1551  | UDP-4-amino-4-deoxy-L-arabinose--oxoglutarateaminotransferase                                                       | Cell envelope biogenesis, outer membrane                                         | M  |  |
| Bkir_c44_1554  | Polymyxin resistance protein ArnT, undecaprenylphosphate-alpha-L-Ara4N transferase, Melittin resistanceprotein PqaB | Cell envelope biogenesis, outer membrane                                         | M  |  |
| Bkir_c7_1480   | ADP-heptose synthase /D-glycero-beta-D-mannoheptose 7-phosphate kinase                                              | Cell envelope biogenesis, outer membrane                                         | M  |  |
| Bkir_c7_1481   | UDP-glucose dehydrogenase                                                                                           | Cell envelope biogenesis, outer membrane                                         | M  |  |
| Bkir_c27_1826  | Nucleoside-diphosphate sugar epimerase/dehydratase                                                                  | Cell envelope biogenesis, outer membrane / Carbohydrate transport and metabolism | MG |  |
| Bkir_c27_1829  | UDP-glucose 4-epimerase                                                                                             | Cell envelope biogenesis, outer membrane / Carbohydrate transport and metabolism | MG |  |
| Bkir_c44_1548  | Polymyxin resistance protein ArnA_DH,UDP-glucuronic acid decarboxylase                                              | Cell envelope biogenesis, outer membrane / Carbohydrate transport and metabolism | MG |  |
| Bkir_c7_1479   | ADP-L-glycero-D-mannoheptose-6-epimerase                                                                            | Cell envelope biogenesis, outer membrane / Carbohydrate transport and metabolism | MG |  |
| Bkir_c10_6252  | Ferrochelataze, protoheme ferro-lyase                                                                               | Coenzyme metabolism                                                              | H  |  |
| Bkir_c105_1108 | Chorismate--pyruvate lyase                                                                                          | Coenzyme metabolism                                                              | H  |  |
| Bkir_c132_1782 | Uroporphyrinogen-III methyltransferase                                                                              | Coenzyme metabolism                                                              | H  |  |
| Bkir_c168_2458 | Thiamine-monophosphate kinase                                                                                       | Coenzyme metabolism                                                              | H  |  |
| Bkir_c17_4538  | Queuosine biosynthesis QueD, PTPS-I                                                                                 | Coenzyme metabolism                                                              | H  |  |
| Bkir_c18_6043  | Dihydrofolate synthase /Folypolyglutamate synthase                                                                  | Coenzyme metabolism                                                              | H  |  |
| Bkir_c2_4689   | Biotin synthesis protein bioC                                                                                       | Coenzyme metabolism                                                              | H  |  |
| Bkir_c206_5744 | GTP cyclohydrolase II                                                                                               | Coenzyme metabolism                                                              | H  |  |
| Bkir_c25_4128  | 2-amino-4-hydroxy-6-hydroxymethylidihydropteridinepyrophosphokinase                                                 | Coenzyme metabolism                                                              | H  |  |
| Bkir_c25_4130  | 3-methyl-2-oxobutanoatehydroxymethyltransferase                                                                     | Coenzyme metabolism                                                              | H  |  |
| Bkir_c26_5810  | Riboflavin kinase / FMNadenylyltransferase                                                                          | Coenzyme metabolism                                                              | H  |  |
| Bkir_c31_1430  | Thiamin-phosphate pyrophosphorylase                                                                                 | Coenzyme metabolism                                                              | H  |  |
| Bkir_c31_1432  | Sulfur carrier protein ThiS                                                                                         | Coenzyme metabolism                                                              | H  |  |

|                |                                                                                                                         |                                                                       |    |                        |
|----------------|-------------------------------------------------------------------------------------------------------------------------|-----------------------------------------------------------------------|----|------------------------|
| Bkir_c32_4016  | Nicotinate-nucleotide adenylyltransferase, bacterial NadD family                                                        | Coenzyme metabolism                                                   | H  |                        |
| Bkir_c46_0476  | Porphobilinogen deaminase                                                                                               | Coenzyme metabolism                                                   | H  |                        |
| Bkir_c46_0478  | Homolog of E. coli HemY protein                                                                                         | Coenzyme metabolism                                                   | H  |                        |
| Bkir_c47_5610  | Thiamin biosynthesis protein ThiC                                                                                       | Coenzyme metabolism                                                   | H  |                        |
| Bkir_c49_6062  | Pyridoxine 5'-phosphate synthase                                                                                        | Coenzyme metabolism                                                   | H  |                        |
| Bkir_c52_4917  | Cobyric acid A,C-diamide synthase                                                                                       | Coenzyme metabolism                                                   | H  |                        |
| Bkir_c52_4918  | Cob(I)alamin adenosyltransferase                                                                                        | Coenzyme metabolism                                                   | H  |                        |
| Bkir_c52_4924  | CobN component of cobalt chelatase involved inB12 biosynthesis                                                          | Coenzyme metabolism                                                   | H  |                        |
| Bkir_c52_4925  | ChII component of cobalt chelatase involved inB12 biosynthesis                                                          | Coenzyme metabolism                                                   | H  |                        |
| Bkir_c52_4926  | ChID component of cobalt chelatase involved inB12 biosynthesis                                                          | Coenzyme metabolism                                                   | H  |                        |
| Bkir_c52_4927  | Cobalamin biosynthesis protein CbiG /Cobalt-precorrin-3b C17-methyltransferase                                          | Coenzyme metabolism                                                   | H  |                        |
| Bkir_c52_4928  | Cobalt-precorrin-2 C20-methyltransferase                                                                                | Coenzyme metabolism                                                   | H  |                        |
| Bkir_c52_4929  | Cobalt-precorrin-8x methylmutase                                                                                        | Coenzyme metabolism                                                   | H  |                        |
| Bkir_c52_4931  | Cobalt-precorrin-6y C5-methyltransferase / Cobalt-precorrin-6y C15-methyltransferase[decarb oxylating]                  | Coenzyme metabolism                                                   | H  |                        |
| Bkir_c52_4933  | Cobalt-precorrin-6x reductase                                                                                           | Coenzyme metabolism                                                   | H  |                        |
| Bkir_c52_4934  | Cobalt-precorrin-4 C11-methyltransferase                                                                                | Coenzyme metabolism                                                   | H  |                        |
| Bkir_c62_5025  | Nicotinate-nucleotide--dimethylbenzimidazolephosphoribosyltransferase                                                   | Coenzyme metabolism                                                   | H  |                        |
| Bkir_c62_5026  | Cobalamin synthase                                                                                                      | Coenzyme metabolism                                                   | H  |                        |
| Bkir_c62_5031  | Adenosylcobinamide-phosphate synthase                                                                                   | Coenzyme metabolism                                                   | H  |                        |
| Bkir_c62_5032  | Adenosylcobinamide-phosphate guanylyltransferase                                                                        | Coenzyme metabolism                                                   | H  |                        |
| Bkir_c62_5033  | Cobyric acid synthase                                                                                                   | Coenzyme metabolism                                                   | H  |                        |
| Bkir_c71_4327  | Uroporphyrinogen III decarboxylase                                                                                      | Coenzyme metabolism                                                   | H  |                        |
| Bkir_c82_5071  | Phosphomethylpyrimidine kinase                                                                                          | Coenzyme metabolism                                                   | H  |                        |
| Bkir_c91_2758  | Octaprenyl-diphosphate synthase /Dimethylallyltransferase /Geranyltransferase / Geranylgeranyl pyrophosphate synthetase | Coenzyme metabolism                                                   | H  |                        |
| Bkir_c95_1623  | Glutamate--cysteine ligase                                                                                              | Coenzyme metabolism                                                   | H  | Glutathione metabolism |
| Bkir_c96_2129  | Nicotinate phosphoribosyltransferase                                                                                    | Coenzyme metabolism                                                   | H  |                        |
| Bkir_c154_3763 | 2-octaprenyl-6-methoxyphenol hydroxylase                                                                                | Coenzyme metabolism / Energy production and conversion                | HC |                        |
| Bkir_c91_2759  | 1-deoxy-D-xylulose 5-phosphate synthase                                                                                 | Coenzyme metabolism / Lipid metabolism                                | HI |                        |
| Bkir_c2_4673   | Glutathione synthetase                                                                                                  | Coenzyme metabolism / Translation, ribosomal structure and biogenesis | HJ | Glutathione metabolism |

|                |                                                                                                   |                                            |   |  |
|----------------|---------------------------------------------------------------------------------------------------|--------------------------------------------|---|--|
| Bkir_c180_0805 | ABC-type multidrug transport system, ATPase component                                             | Defense mechanisms                         |   |  |
| Bkir_c180_0806 | ABC-type multidrug transport system, permease component                                           | Defense mechanisms                         |   |  |
| Bkir_c6_3056   | Lipoprotein releasing system ATP-binding protein LoID                                             | Defense mechanisms                         |   |  |
| Bkir_c13_6201  | Excinuclease ABC subunit C                                                                        | DNA replication, recombination, and repair | L |  |
| Bkir_c170_1733 | Excinuclease ABC subunit B                                                                        | DNA replication, recombination, and repair | L |  |
| Bkir_c178_0365 | DNA-binding protein HU                                                                            | DNA replication, recombination, and repair | L |  |
| Bkir_c25_4120  | DNA mismatch repair protein MutL                                                                  | DNA replication, recombination, and repair | L |  |
| Bkir_c28_2971  | Uracil-DNA glycosylase, family 1                                                                  | DNA replication, recombination, and repair | L |  |
| Bkir_c49_6063  | DNA recombination and repair protein RecO                                                         | DNA replication, recombination, and repair | L |  |
| Bkir_c6_3053   | Single-stranded-DNA-specific exonuclease RecJ                                                     | DNA replication, recombination, and repair | L |  |
| Bkir_c6_3096   | DNA mismatch repair protein MutS                                                                  | DNA replication, recombination, and repair | L |  |
| Bkir_c67_4304  | DNA primase                                                                                       | DNA replication, recombination, and repair | L |  |
| Bkir_c91_2750  | DNA polymerase I                                                                                  | DNA replication, recombination, and repair | L |  |
| Bkir_c119_5128 | Putative periplasmic cytochrome oxidoreductase type-C signal peptide protein                      | Energy production and conversion           | C |  |
| Bkir_c119_5129 | Putative periplasmic cytochrome oxidoreductase type-C signal peptide protein                      | Energy production and conversion           | C |  |
| Bkir_c12_2347  | Ferredoxin--NADP(+) reductase                                                                     | Energy production and conversion           | C |  |
| Bkir_c15_5310  | Rubredoxin-NAD(+) reductase                                                                       | Energy production and conversion           | C |  |
| Bkir_c170_1737 | Ferredoxin                                                                                        | Energy production and conversion           | C |  |
| Bkir_c172_3903 | Cobalamin biosynthesis protein BluB 5,6-dimethylbenzimidazole synthase, flavin destructase family | Energy production and conversion           | C |  |
| Bkir_c2_4633   | FIG00453717: hypothetical protein                                                                 | Energy production and conversion           | C |  |
| Bkir_c2_4692   | Cytochrome c oxidase polypeptide I                                                                | Energy production and conversion           | C |  |
| Bkir_c2_4695   | Cytochrome c oxidase polypeptide III                                                              | Energy production and conversion           | C |  |
| Bkir_c203_4881 | Citrate synthase (si)                                                                             | Energy production and conversion           | C |  |
| Bkir_c25_4135  | Cytochrome c4                                                                                     | Energy production and conversion           | C |  |
| Bkir_c25_4136  | Putative diheme cytochrome c-553                                                                  | Energy production and conversion           | C |  |
| Bkir_c33_3893  | ATP synthase B chain                                                                              | Energy production and conversion           | C |  |
| Bkir_c60_2293  | Succinate dehydrogenase hydrophobic membrane anchor protein                                       | Energy production and conversion           | C |  |
| Bkir_c60_2294  | Succinate dehydrogenase cytochrome b-556 subunit                                                  | Energy production and conversion           | C |  |
| Bkir_c92_0577  | Malate dehydrogenase                                                                              | Energy production and conversion           | C |  |
| Bkir_c92_0586  | Aconitate hydratase @2-methylisocitrate dehydratase                                               | Energy production and conversion           | C |  |
| Bkir_c10_6264  | Cob(I)alamin adenosyltransferase PduO                                                             | Function unknown                           | S |  |
| Bkir_c103_2561 | FIG000557: hypothetical protein co-occurring with RecR                                            | Function unknown                           | S |  |

|                |                                                                                                    |                                  |   |  |
|----------------|----------------------------------------------------------------------------------------------------|----------------------------------|---|--|
| Bkir_c103_2565 | Inner membrane protein                                                                             | Function unknown                 | S |  |
| Bkir_c118_3279 | Sirohydrochlorin cobaltochelataase                                                                 | Function unknown                 | S |  |
| Bkir_c133_4185 | Predicted membrane protein                                                                         | Function unknown                 | S |  |
| Bkir_c15_5396  | COG1565: Uncharacterized conserved protein                                                         | Function unknown                 | S |  |
| Bkir_c171_0648 | FIG003276: zinc-binding protein                                                                    | Function unknown                 | S |  |
| Bkir_c171_0649 | FIG002842: hypothetical protein                                                                    | Function unknown                 | S |  |
| Bkir_c2_4669   | FIG00453990: hypothetical protein                                                                  | Function unknown                 | S |  |
| Bkir_c20_3829  | UPF0125 protein yjfF                                                                               | Function unknown                 | S |  |
| Bkir_c203_4882 | YgfY COG2938                                                                                       | Function unknown                 | S |  |
| Bkir_c211_0165 | Probable transmembrane protein                                                                     | Function unknown                 | S |  |
| Bkir_c211_0166 | Probable transmembrane protein                                                                     | Function unknown                 | S |  |
| Bkir_c24_4070  | putative lipoprotein                                                                               | Function unknown                 | S |  |
| Bkir_c34_2548  | Cell division protein MraZ                                                                         | Function unknown                 | S |  |
| Bkir_c44_1556  | Membrane protein                                                                                   | Function unknown                 | S |  |
| Bkir_c45_4856  | ABC transporter ATP-binding protein                                                                | Function unknown                 | S |  |
| Bkir_c53_5706  | Transporter                                                                                        | Function unknown                 | S |  |
| Bkir_c53_5710  | Protein YigP (COG3165) clustered with ubiquinone biosynthetic genes                                | Function unknown                 | S |  |
| Bkir_c53_5721  | NADPH dependent preQ0 reductase                                                                    | Function unknown                 | S |  |
| Bkir_c59_5280  | Copper metallochaperone, bacterial analog of Cox17 protein                                         | Function unknown                 | S |  |
| Bkir_c6_3054   | Regulatory protein, RpfE type                                                                      | Function unknown                 | S |  |
| Bkir_c66_2507  | Putative cytoplasmic protein                                                                       | Function unknown                 | S |  |
| Bkir_c68_5575  | UPF0434 protein YcaR                                                                               | Function unknown                 | S |  |
| Bkir_c78_2064  | Believed to be involved in assembly of Fe-S clusters                                               | Function unknown                 | S |  |
| Bkir_c79_3389  | LptA, protein essential for LPS transport across the periplasm                                     | Function unknown                 | S |  |
| Bkir_c9_5446   | Serine/threonine kinase                                                                            | Function unknown                 | S |  |
| Bkir_c90_6087  | Uncharacterized protein conserved in bacteria                                                      | Function unknown                 | S |  |
| Bkir_c163_1964 | undefined product                                                                                  | Function unknown                 | S |  |
| Bkir_c28_2972  | undefined product                                                                                  | Function unknown                 | S |  |
| Bkir_c10_6231  | Zinc metalloprotease                                                                               | General function prediction only | R |  |
| Bkir_c10_6260  | FIG003879: Predicted amidohydrolase                                                                | General function prediction only | R |  |
| Bkir_c11_4436  | Probable component of the lipoprotein assembly complex (forms a complex with YaeT, YfgL, and NlpB) | General function prediction only | R |  |
| Bkir_c12_2381  | DNA-binding protein H-NS                                                                           | General function prediction only | R |  |
| Bkir_c15_5372  | Membrane protein involved in the export of O-antigen and teichoic acid                             | General function prediction only | R |  |
| Bkir_c15_5373  | Glycosyl transferase, family 2                                                                     | General function prediction only | R |  |
| Bkir_c19_4791  | GTP-binding protein EngA                                                                           | General function prediction only | R |  |
| Bkir_c19_4792  | RNA-binding protein Hfq                                                                            | General function prediction only | R |  |
| Bkir_c191_3654 | putative, Molybdenum cofactor biosynthesis protein                                                 | General function prediction only | R |  |

|                |                                                                              |                                         |   |                                 |
|----------------|------------------------------------------------------------------------------|-----------------------------------------|---|---------------------------------|
|                | A                                                                            |                                         |   |                                 |
| Bkir_c2_4698   | Probable transmembrane protein                                               | General function prediction only        | R |                                 |
| Bkir_c22_0121  | ATPase YjeE, predicted to have essential role in cell wall biosynthesis      | General function prediction only        | R |                                 |
| Bkir_c24_4064  | FOG: Ankyrin repeat                                                          | General function prediction only        | R |                                 |
| Bkir_c3_2200   | hypothetical protein                                                         | General function prediction only        | R |                                 |
| Bkir_c31_1434  | ABC transporter, fused ATPase and inner membrane subunits                    | General function prediction only        | R |                                 |
| Bkir_c36_3530  | Anti-anti-sigma regulatory factor (antagonist of anti-sigma factor)          | General function prediction only        | R |                                 |
| Bkir_c41_0736  | membrane protein, putative                                                   | General function prediction only        | R |                                 |
| Bkir_c44_1560  | ATPase components of ABC transporters with duplicated ATPase domains         | General function prediction only        | R |                                 |
| Bkir_c51_2613  | GTP-binding protein EngB                                                     | General function prediction only        | R |                                 |
| Bkir_c52_4923  | CobW GTPase involved in cobalt insertion for B12 biosynthesis                | General function prediction only        | R |                                 |
| Bkir_c57_5558  | Inosine-5'-monophosphate dehydrogenase                                       | General function prediction only        | R |                                 |
| Bkir_c82_5074  | Ribosomal-protein-S18p-alanine acetyltransferase                             | General function prediction only        | R |                                 |
| Bkir_c91_2745  | Homoserine kinase                                                            | General function prediction only        | R |                                 |
| Bkir_c1_2880   | ABC-type nitrate/sulfonate/bicarbonate transport system, ATPase component    | Inorganic ion transport and metabolism  | P |                                 |
| Bkir_c1_2881   | ABC-type anion transport system, duplicated permease component               | Inorganic ion transport and metabolism  | P |                                 |
| Bkir_c113_0534 | Zinc ABC transporter, inner membrane permease protein ZnuB                   | Inorganic ion transport and metabolism  | P |                                 |
| Bkir_c113_0535 | Zinc ABC transporter, ATP-binding protein ZnuC                               | Inorganic ion transport and metabolism  | P |                                 |
| Bkir_c113_0539 | Zinc uptake regulation protein ZUR                                           | Inorganic ion transport and metabolism  | P |                                 |
| Bkir_c170_1734 | Periplasmic protein p19 involved in high-affinity Fe <sup>2+</sup> transport | Inorganic ion transport and metabolism  | P |                                 |
| Bkir_c170_1736 | High-affinity iron permease                                                  | Inorganic ion transport and metabolism  | P |                                 |
| Bkir_c205_4849 | Kup system potassium uptake protein                                          | Inorganic ion transport and metabolism  | P |                                 |
| Bkir_c52_4930  | Cobalamin biosynthesis protein CobG                                          | Inorganic ion transport and metabolism  | P |                                 |
| Bkir_c66_2508  | Transporter, monovalent cation:proton antiporter-2 (CPA2) family             | Inorganic ion transport and metabolism  | P |                                 |
| Bkir_c66_2522  | Superoxide dismutase [Cu-Zn]                                                 | Inorganic ion transport and metabolism  | P | superoxide radicals degradation |
| Bkir_c4_0313   | undefined product                                                            | Intracellular trafficking and secretion |   |                                 |
| Bkir_c123_5758 | 4-diphosphocytidyl-2-C-methyl-D- erythritolkinase                            | Lipid metabolism                        | I |                                 |
| Bkir_c126_1575 | 2-C-methyl-D-erythritol 2,4-cyclodiphosphate synthase                        | Lipid metabolism                        | I |                                 |
| Bkir_c18_6042  | Acetyl-coenzyme A carboxyl transferase betachain                             | Lipid metabolism                        | I |                                 |
| Bkir_c20_3815  | (3R)-hydroxymyristoyl-[acyl carrier protein] dehydratase                     | Lipid metabolism                        | I |                                 |
| Bkir_c49_6061  | Holo-[acyl-carrier protein] synthase                                         | Lipid metabolism                        | I |                                 |
| Bkir_c6_3045   | Phosphatidylserine decarboxylase                                             | Lipid metabolism                        | I |                                 |

|                |                                                                                        |                                                                                                                |     |                      |
|----------------|----------------------------------------------------------------------------------------|----------------------------------------------------------------------------------------------------------------|-----|----------------------|
| Bkir_c86_5986  | Phytoene synthase                                                                      | Lipid metabolism                                                                                               | I   |                      |
| Bkir_c18_6046  | Amidophosphoribosyltransferase                                                         | Nucleotide transport and metabolism                                                                            | F   |                      |
| Bkir_c25_4125  | Phosphoribosylformylglycinamide cyclo-ligase                                           | Nucleotide transport and metabolism                                                                            | F   |                      |
| Bkir_c26_5809  | Phosphoribosylglycinamide formyltransferase                                            | Nucleotide transport and metabolism                                                                            | F   |                      |
| Bkir_c5_4991   | Nucleoside 5-triphosphatase RdgB (dHATP, dITP,XTP-specific)                            | Nucleotide transport and metabolism                                                                            | F   |                      |
| Bkir_c58_0784  | Phosphoribosylformylglycinamide synthase,synthetase subunit                            | Nucleotide transport and metabolism                                                                            | F   |                      |
| Bkir_c7_1463   | Orotate phosphoribosyltransferase                                                      | Nucleotide transport and metabolism                                                                            | F   |                      |
| Bkir_c7_1487   | Cytidylate kinase                                                                      | Nucleotide transport and metabolism                                                                            | F   |                      |
| Bkir_c36_3514  | FIG146285: Diadenosine tetraphosphate (Ap4A) hydrolase and other HIT family hydrolases | Nucleotide transport and metabolism / Carbohydrate transport and metabolism / General function prediction only | FGR |                      |
| Bkir_c98_2690  | tRNA-specific adenosine-34 deaminase                                                   | Nucleotide transport and metabolism / Translation, ribosomal structure and biogenesis                          | FJ  |                      |
| Bkir_c17_4537  | Queuosine Biosynthesis QueE Radical SAM                                                | Posttranslational modification, protein turnover, chaperones                                                   | O   |                      |
| Bkir_c183_3540 | Peptide methionine sulfoxide reductase MsrB                                            | Posttranslational modification, protein turnover, chaperones                                                   | O   |                      |
| Bkir_c20_3801  | [Protein-PII] uridylyltransferase                                                      | Posttranslational modification, protein turnover, chaperones                                                   | O   |                      |
| Bkir_c26_5819  | ATP-dependent Clp protease ATP-binding subunit ClpA                                    | Posttranslational modification, protein turnover, chaperones                                                   | O   |                      |
| Bkir_c36_3510  | Outer membrane stress sensor protease DegQ,serine protease                             | Posttranslational modification, protein turnover, chaperones                                                   | O   |                      |
| Bkir_c38_2426  | Alkyl hydroperoxide reductase subunit C-like protein                                   | Posttranslational modification, protein turnover, chaperones                                                   | O   |                      |
| Bkir_c46_0483  | Protein-L-isoaspartate O-methyltransferase                                             | Posttranslational modification, protein turnover, chaperones                                                   | O   |                      |
| Bkir_c51_2586  | Periplasmic thiol:disulfide oxidoreductase DsbB, required for DsbA reoxidation         | Posttranslational modification, protein turnover, chaperones                                                   | O   |                      |
| Bkir_c6_3094   | FKBP-type peptidyl-prolyl cis-trans isomerase SlyD                                     | Posttranslational modification, protein turnover, chaperones                                                   | O   |                      |
| Bkir_c67_4307  | YgjD/Kae1/Qri7 family, required for threonylcarbamoyladenosine formation in tRNA       | Posttranslational modification, protein turnover, chaperones                                                   | O   |                      |
| Bkir_c82_5075  | Inactive homolog of metal-dependent proteases,putative molecular chaperone             | Posttranslational modification, protein turnover, chaperones                                                   | O   |                      |
| Bkir_c90_6110  | Glutaredoxin-related protein                                                           | Posttranslational modification, protein turnover, chaperones                                                   | O   | glutaredoxin pathway |
| Bkir_c17_4512  | Thiol-disulfide isomerase and thioredoxins                                             | Posttranslational modification, protein turnover, chaperones / Energy production and conversion                | OC  | thioredoxin pathway  |
| Bkir_c2_4664   | Thiol:disulfide interchange protein tlpA                                               | Posttranslational modification, protein turnover, chaperones / Energy production and conversion                | OC  |                      |
| Bkir_c40_1365  | Cytochrome c-type biogenesis protein DsbD,protein-disulfide reductase                  | Posttranslational modification, protein turnover, chaperones / Energy production and conversion                | OC  |                      |
| Bkir_c14_3225  | 3'-to-5' oligoribonuclease (orn)                                                       | RNA processing and modification                                                                                |     |                      |
| Bkir_c12_2342  | Protein involved in biosynthesis of mitomycin antibiotics/polyketide fumonisin         | Secondary metabolites biosynthesis, transport, and catabolism                                                  | Q   |                      |

|                |                                                                                                     |                                                                                                  |    |  |
|----------------|-----------------------------------------------------------------------------------------------------|--------------------------------------------------------------------------------------------------|----|--|
| Bkir_c36_3531  | Uncharacterized ABC transporter, component YrbC auxiliary                                           | Secondary metabolites biosynthesis, transport, and catabolism                                    | Q  |  |
| Bkir_c15_5397  | FoIM Alternative dihydrofolate reductase 1                                                          | Secondary metabolites biosynthesis, transport, and catabolism / General function prediction only | QR |  |
| Bkir_c1_2868   | Response regulator containing CheY-like receiver, AAA-type ATPase, and DNA-binding domains          | Signal transduction mechanisms                                                                   | T  |  |
| Bkir_c1_2875   | Response regulator containing CheY-like receiver, AAA-type ATPase, and DNA-binding domains          | Signal transduction mechanisms                                                                   | T  |  |
| Bkir_c102_5934 | Signal transduction histidine kinase                                                                | Signal transduction mechanisms                                                                   | T  |  |
| Bkir_c11_4471  | FIG00974056: hypothetical protein                                                                   | Signal transduction mechanisms                                                                   | T  |  |
| Bkir_c127_0391 | Signal transduction histidine kinase                                                                | Signal transduction mechanisms                                                                   | T  |  |
| Bkir_c183_3543 | Cell division protein BolA                                                                          | Signal transduction mechanisms                                                                   | T  |  |
| Bkir_c44_1545  | Predicted ATPase related to phosphate starvation-inducible protein PhoH                             | Signal transduction mechanisms                                                                   | T  |  |
| Bkir_c49_6070  | Sigma factor RpoE negative regulatory protein RseB precursor                                        | Signal transduction mechanisms                                                                   | T  |  |
| Bkir_c64_0432  | Nitrogen regulation protein NR(I)                                                                   | Signal transduction mechanisms                                                                   | T  |  |
| Bkir_c64_0433  | FOG: PAS/PAC domain                                                                                 | Signal transduction mechanisms                                                                   | T  |  |
| Bkir_c70_5965  | GTP-binding protein TypA/BipA                                                                       | Signal transduction mechanisms                                                                   | T  |  |
| Bkir_c102_5933 | Response regulators consisting of a CheY-like receiver domain and a winged-helix DNA-binding domain | Signal transduction mechanisms / Transcription                                                   | TK |  |
| Bkir_c126_1568 | Two-component system response regulator OmpR                                                        | Signal transduction mechanisms / Transcription                                                   | TK |  |
| Bkir_c1_2859   | RNA polymerase sigma-54 factor RpoN                                                                 | Transcription                                                                                    | K  |  |
| Bkir_c10_6280  | Hydrogen peroxide-inducible genes activator                                                         | Transcription                                                                                    | K  |  |
| Bkir_c2_4636   | Pantothenate kinase type III, CoaX-like                                                             | Transcription                                                                                    | K  |  |
| Bkir_c40_1409  | DNA-directed RNA polymerase beta subunit                                                            | Transcription                                                                                    | K  |  |
| Bkir_c41_0725  | Transcription termination protein NusB                                                              | Transcription                                                                                    | K  |  |
| Bkir_c49_6072  | RNA polymerase sigma factor RpoE                                                                    | Transcription                                                                                    | K  |  |
| Bkir_c6_3040   | DNA-directed RNA polymerase specialized sigma subunit, sigma24-like                                 | Transcription                                                                                    | K  |  |
| Bkir_c9_5407   | 3'-to-5' exoribonuclease RNase R                                                                    | Transcription                                                                                    | K  |  |
| Bkir_c11_4435  | DinG family ATP-dependent helicase YoaA                                                             | Transcription / DNA replication, recombination, and repair                                       | KL |  |
| Bkir_c37_3337  | DNA-binding protein Fis                                                                             | Transcription / DNA replication, recombination, and repair                                       | KL |  |
| Bkir_c10_6282  | S-adenosylmethionine:tRNA ribosyltransferase-isomerase                                              | Translation, ribosomal structure and biogenesis                                                  | J  |  |
| Bkir_c105_1121 | Putative translation initiation inhibitor, yjgF family                                              | Translation, ribosomal structure and biogenesis                                                  | J  |  |
| Bkir_c14_3234  | SSU ribosomal protein S16p                                                                          | Translation, ribosomal structure and biogenesis                                                  | J  |  |
| Bkir_c160_5733 | unnamed protein product                                                                             | Translation, ribosomal structure and biogenesis                                                  | J  |  |
| Bkir_c18_6038  | unnamed protein product                                                                             | Translation, ribosomal structure and biogenesis                                                  | J  |  |
| Bkir_c22_0069  | YrdC/Sua5 family protein, required for                                                              | Translation, ribosomal structure and biogenesis                                                  | J  |  |



|                |                                                               |                                                 |   |  |
|----------------|---------------------------------------------------------------|-------------------------------------------------|---|--|
|                | threonylcarbamoyladenine (t(6)A) formation in tRNA            |                                                 |   |  |
| Bkir_c3_2230   | Translation initiation factor 1                               | Translation, ribosomal structure and biogenesis | J |  |
| Bkir_c32_4012  | Cytoplasmic axial filament protein CafA and Ribonuclease G    | Translation, ribosomal structure and biogenesis | J |  |
| Bkir_c40_1377  | LSU ribosomal protein L36p                                    | Translation, ribosomal structure and biogenesis | J |  |
| Bkir_c40_1378  | Translation initiation factor 1                               | Translation, ribosomal structure and biogenesis | J |  |
| Bkir_c40_1388  | LSU ribosomal protein L24p (L26e)                             | Translation, ribosomal structure and biogenesis | J |  |
| Bkir_c57_5535  | LSU ribosomal protein L35p                                    | Translation, ribosomal structure and biogenesis | J |  |
| Bkir_c57_5536  | Translation initiation factor 3                               | Translation, ribosomal structure and biogenesis | J |  |
| Bkir_c6_3085   | Tryptophanyl-tRNA synthetase                                  | Translation, ribosomal structure and biogenesis | J |  |
| Bkir_c68_5583  | SSU ribosomal protein S20p                                    | Translation, ribosomal structure and biogenesis | J |  |
| Bkir_c79_3385  | Ribosome hibernation protein YhbH                             | Translation, ribosomal structure and biogenesis | J |  |
| Bkir_c8_3439   | LSU ribosomal protein L21p                                    | Translation, ribosomal structure and biogenesis | J |  |
| Bkir_c88_6120  | Ribonuclease P protein component                              | Translation, ribosomal structure and biogenesis | J |  |
| Bkir_c4_0290   | Enoyl-[acyl-carrier-protein] reductase [NADH]                 | acyl-carrier-protein                            |   |  |
| Bkir_c11_4433  | Membrane protein involved in colicin uptake                   | no assignment                                   |   |  |
| Bkir_c118_3294 | Chromosome segregation ATPases                                | no assignment                                   |   |  |
| Bkir_c121_2677 | FIG01282171: hypothetical protein                             | no assignment                                   |   |  |
| Bkir_c13_6185  | FIG00453615: hypothetical protein                             | no assignment                                   |   |  |
| Bkir_c14_3236  | Probable transmembrane protein                                | no assignment                                   |   |  |
| Bkir_c170_1735 | putative exported protein                                     | no assignment                                   |   |  |
| Bkir_c181_1019 | Nucleoside-diphosphate-sugar epimerases                       | no assignment                                   |   |  |
| Bkir_c2_4617   | FIG00452673: hypothetical protein                             | no assignment                                   |   |  |
| Bkir_c2_4696   | Probable transmembrane protein                                | no assignment                                   |   |  |
| Bkir_c211_0167 | hypothetical protein                                          | no assignment                                   |   |  |
| Bkir_c25_4143  | FIG00453399: hypothetical protein                             | no assignment                                   |   |  |
| Bkir_c3_2202   | COG0489: ATPases involved in chromosome partitioning          | no assignment                                   |   |  |
| Bkir_c4_0328   | Probable transmembrane protein                                | no assignment                                   |   |  |
| Bkir_c4_0355   | FIG00453072: hypothetical protein                             | no assignment                                   |   |  |
| Bkir_c44_1552  | Permease of the drug/metabolite transporter(DMT) superfamily  | no assignment                                   |   |  |
| Bkir_c47_5652  | Histone acetyltransferase HPA2 and related acetyltransferases | no assignment                                   |   |  |
| Bkir_c51_2595  | Probable transmembrane protein                                | no assignment                                   |   |  |
| Bkir_c52_4915  | hypothetical protein                                          | no assignment                                   |   |  |
| Bkir_c52_4916  | Predicted cobalt transporter CbtA                             | no assignment                                   |   |  |
| Bkir_c66_2513  | FIG00454446: hypothetical protein                             | no assignment                                   |   |  |
| Bkir_c7_1493   | Probable signal peptide protein                               | no assignment                                   |   |  |

|               |                                                |               |  |  |
|---------------|------------------------------------------------|---------------|--|--|
| Bkir_c78_2075 | hypothetical protein                           | no assignment |  |  |
| Bkir_c82_5068 | Probable transmembrane protein                 | no assignment |  |  |
| Bkir_c9_5512  | Permeases of the major facilitator superfamily | no assignment |  |  |
| Bkir_c92_0584 | Probable signal peptide protein                | no assignment |  |  |
| Bkir_c95_1644 | General secretion pathway protein C            | no assignment |  |  |
| Bkir_c9_5513  | undefined product                              | no assignment |  |  |

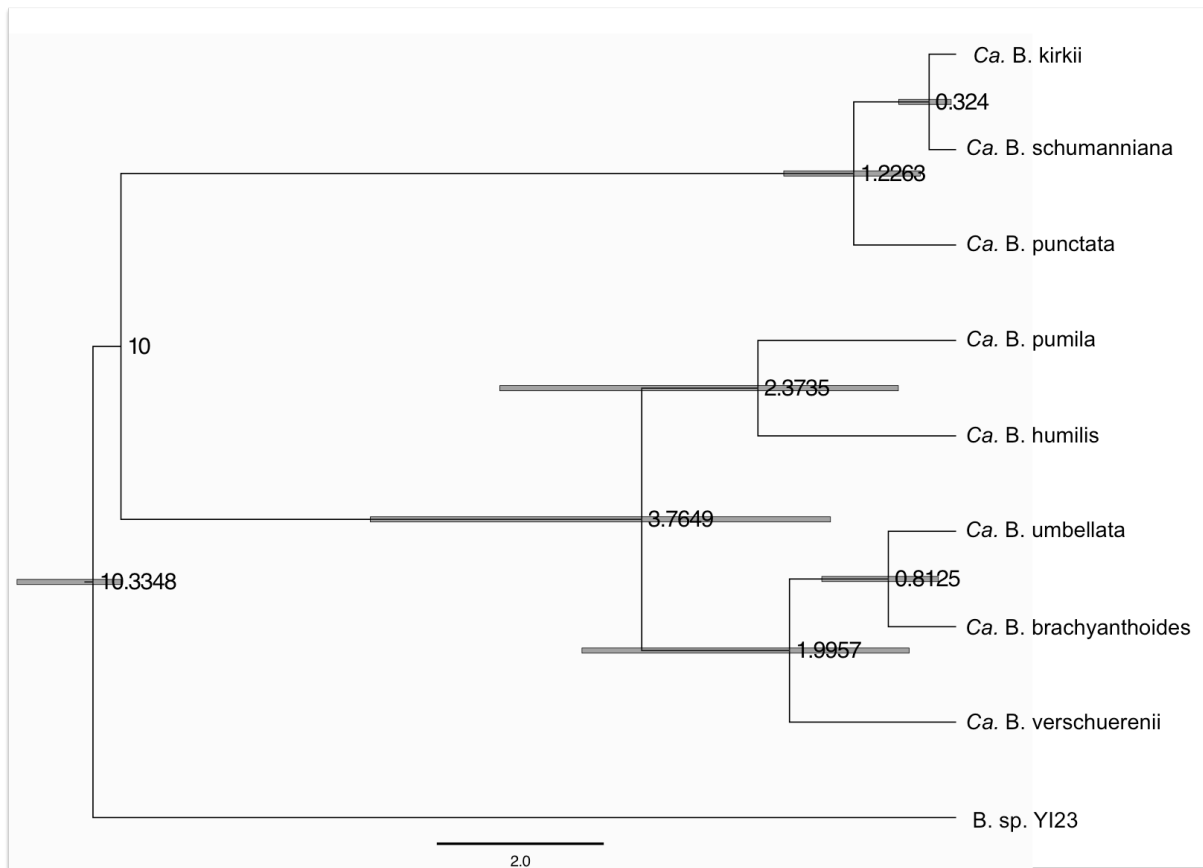

**Fig. S5. Bayesian divergence time estimation of leaf nodule symbiosis in *Burkholderia* leaf nodule symbionts.** Maximum likelihood phylogenetic reconstruction of the bacterial leaf nodule symbionts obtained with BEAST (2.2.0). The mean time ages estimated in Mya are specified in each node. Confidence intervals (95%) are highlighted in grey.

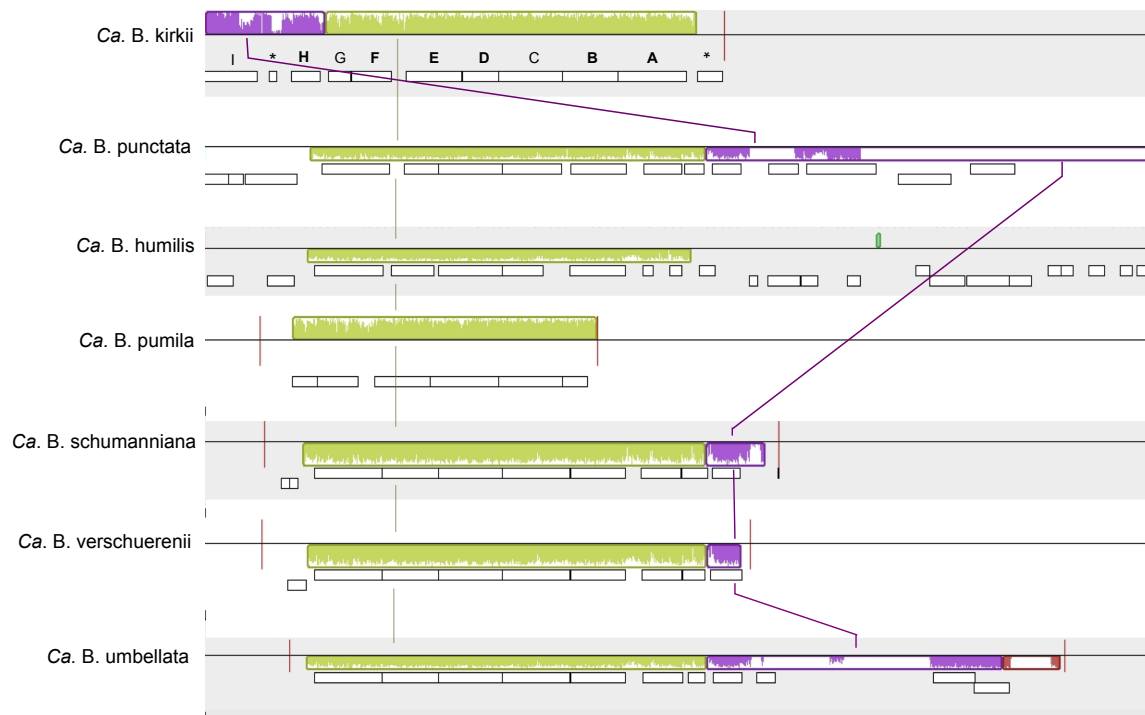

**Fig. S6. Mauve alignment of gene clusters involved in secondary metabolite production in leaf nodule symbionts** (*Ca. B. brachyanthoides* not shown). Horizontal lines represent the genomic region for each genome including the annotated coding regions (white boxes). *Ca. B. kirkii* is used as a reference. The annotation of the boxes corresponds to (A) 2-epi-5-epi-valiolone synthase Bkir\_c149\_4879, (B) N-acetylmannosamine kinase Bkir\_c149\_4878, (C) Aminosugar transaminase Bkir\_c149\_4877, (D) Glycoside hydrolase Bkir\_c149\_4876, (E) Sugar dehydrogenase Bkir\_c149\_4875, (F) HAD family hydrolase Bkir\_c149\_4874, (G) Sugar phosphate isomerase Bkir\_c149\_4873, (H) acetyltransferase, GNAT family Bkir\_c149\_4872. The genes conserved among all the leaf nodule symbionts are shown in bold. (\*) represent hypothetical proteins. The colored boxes represent a similarity plot, the height of which is proportional to the level of sequence identity in that region.

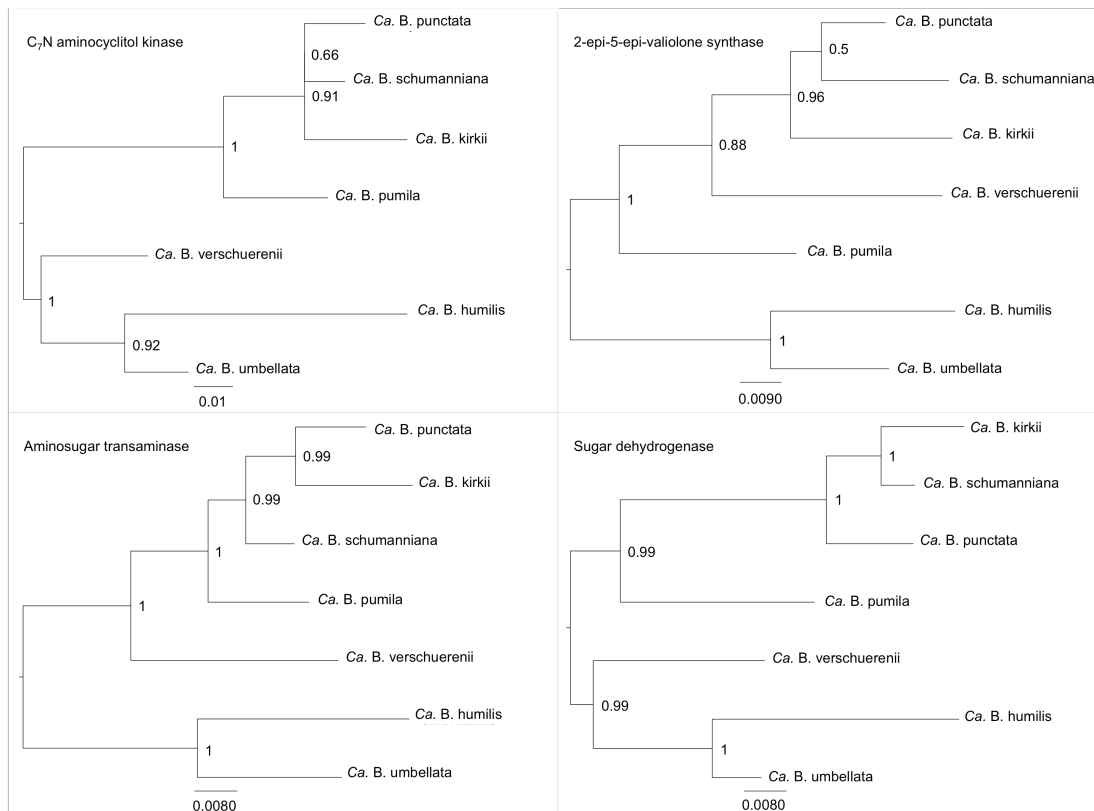

**Fig. S7. Maximum parsimony phylogenetic reconstruction of the secondary metabolites genes conserved in all leaf nodule symbionts.** Bootstrap values are shown as proportions (scale from 0 to 1). Homologous genes from *Pseudomonas* sp. CFT9 (2-epi-5-epi-valiolone synthase, c7-cyclitol-7-kinase) and *Pseudomonas fluorescens* A506 (putative dehydrogenase, aminotransferase) was used as outgroup (not shown).

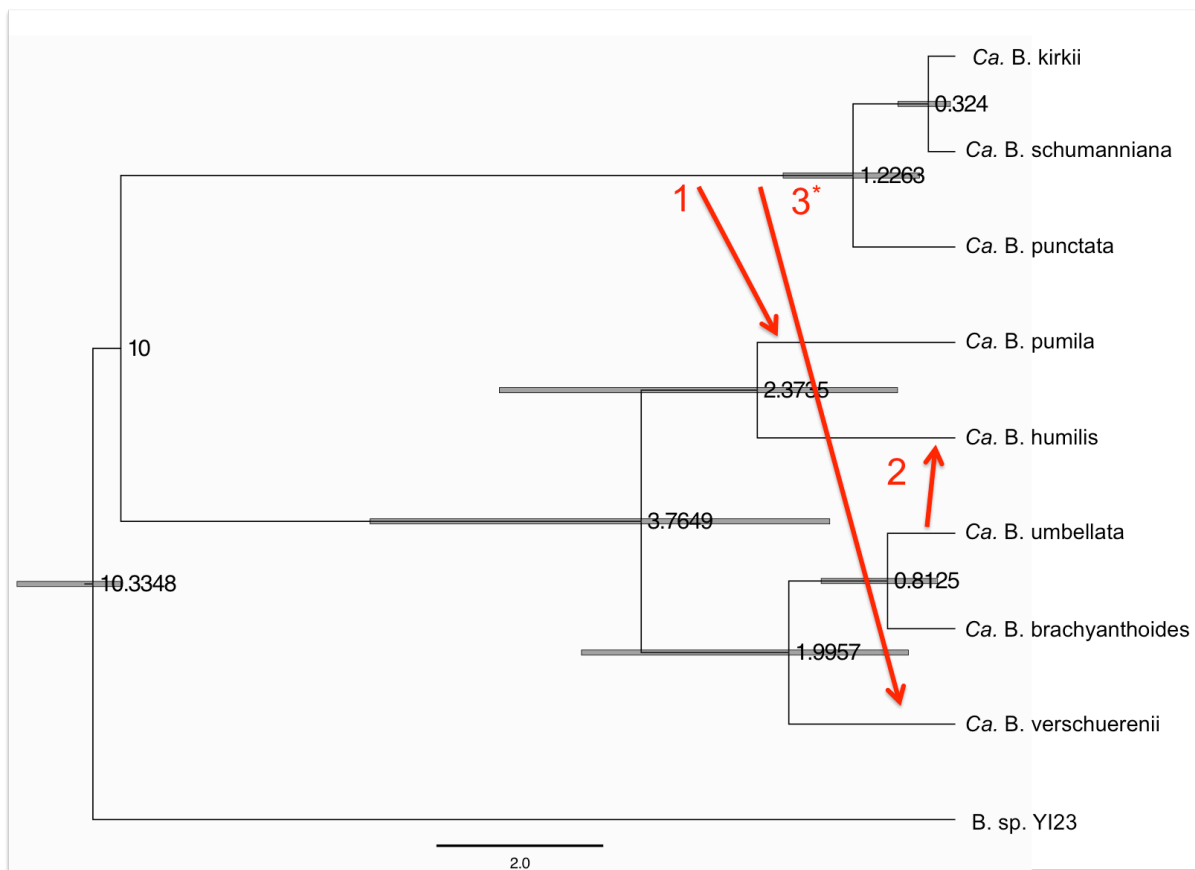

**Fig. S8. Proposed horizontal gene transfer events affecting the genes involved in the biosynthesis of the secondary metabolites of the C7N aminocyclitol family.** Arrows indicate the hypothetical direction of horizontal gene transfer events, inferred from the phylogenetic analysis presented on Fig. S7. Asterisk denotes a HGT event that affected only the 2-epi-5-epi-valiolone synthase gene.

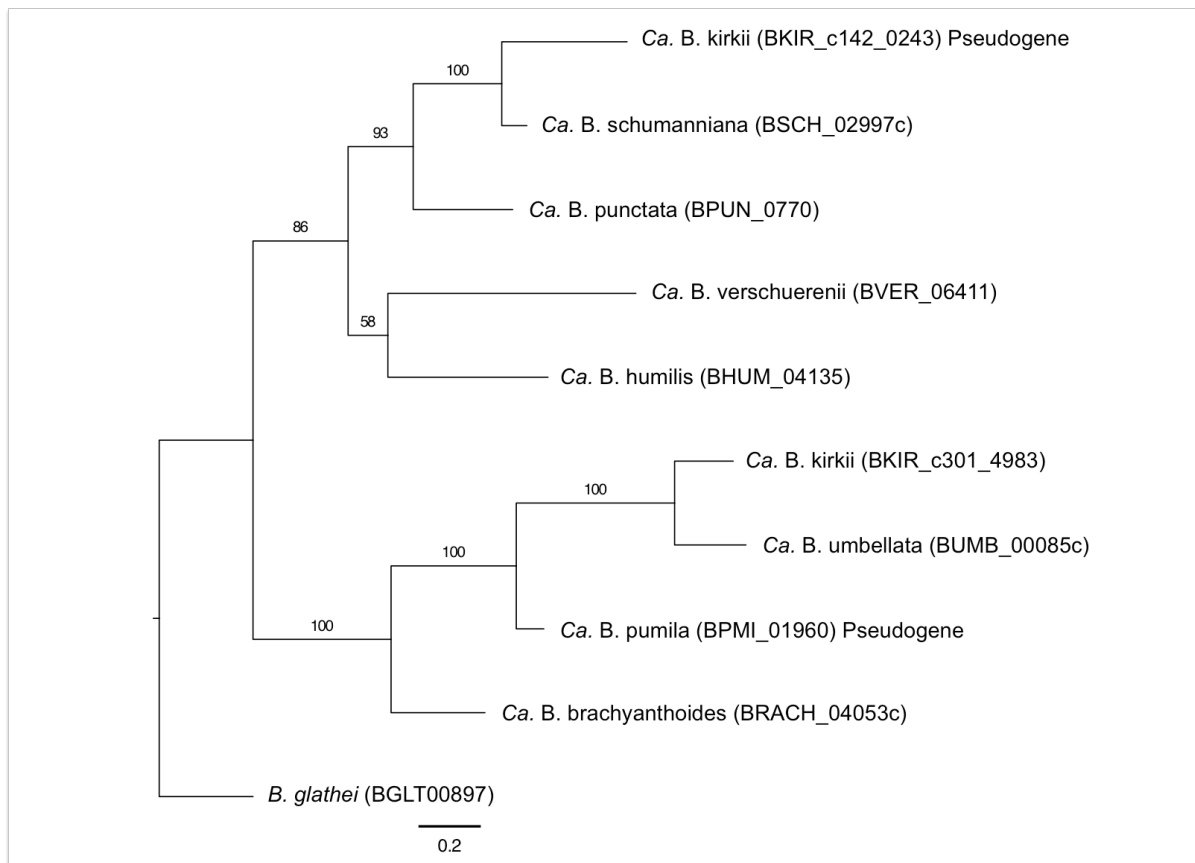

**Fig. S9. Maximum likelihood phylogenetic reconstruction of the replication protein A conserved in most of the leaf nodule symbionts.** The alignment also included pseudogene copies of the genes where indicated. Large gaps and poorly aligned regions were trimmed.
